# Supplementary material for: Seeking environmentally friendly halide perovskite photocatalysts: synthesis, structure and photocatalytic performance exploration
Source: Royal Society of Chemistry journal article supplement (doi:10.1039/d3dt02990e), 2023-12-05
Supplement: d3dt02990e1.pdf [file d3dt02990e1.pdf]

## Seeking for environmentally friendly halide perovskite photocatalysts: synthesis, structure and photocatalytic performance exploration

Cheng-An Hu, Jian-Peng Qin, and Chun-Yang Pan\*†

†School of Chemical Engineering and Light Industry, Guangdong University of technology,  
Ghuangzhou 510006, China.; \*E-mail: [panchuny@gdut.edu.cn](mailto:panchuny@gdut.edu.cn)

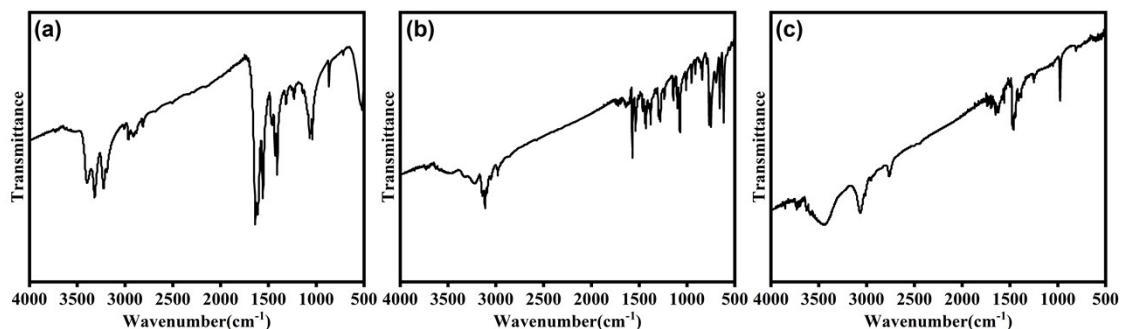

Figure S1 (a) FT-IR spectra of **1**, (b) FT-IR spectra of **2**, (c) FT-IR spectra of **3**.

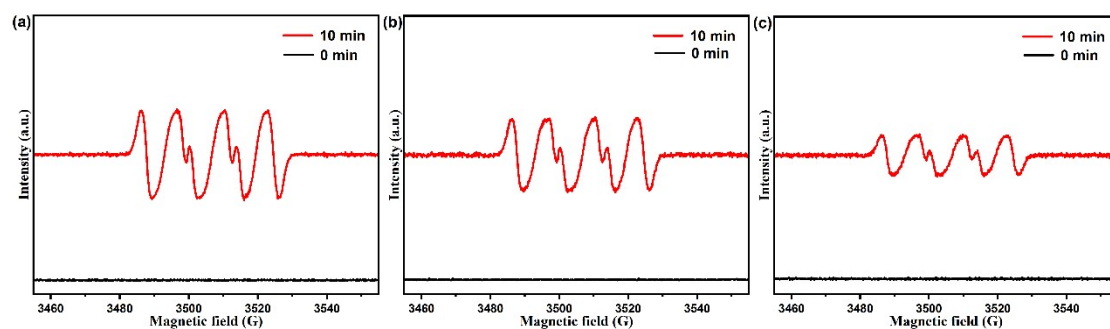

Figure S2 The DMPO spin-trapping EPR spectrum of **1** (a), **2** (b) and **3** (c) for  $\cdot\text{O}_2$ .

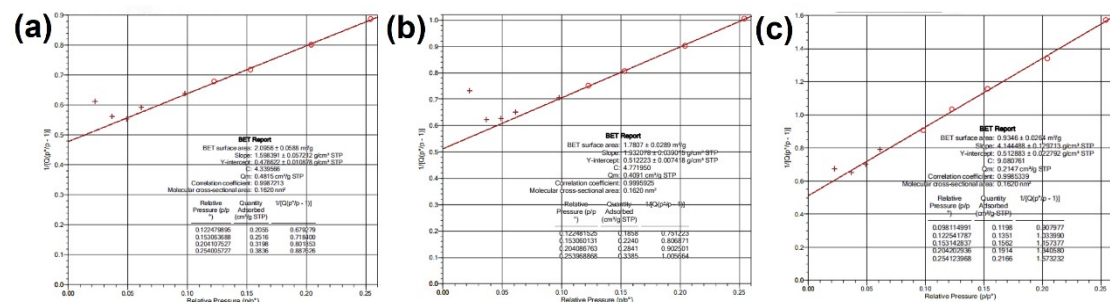

Figure S3 Specific surface area fitted through  $\text{N}_2$  isothermal adsorption test.

### Materials and Methods.

**Table S1** shows the fractional atomic coordinates and equivalent thermal isotropic displacement  $U(\text{eq})$  of **1** with estimated standard deviations (esd) in parentheses. **Table S2** shows the selected bond lengths ( $\text{\AA}$ ) and angles (deg) of **1**. **Table S3** shows the details of H-Bs for **1**. **Table S4** shows the

fractional atomic coordinates and equivalent thermal isotropic displacement  $U(\text{eq})$  of **2** with esd in parentheses. **Table S5** shows the selected bond lengths (Å) and angles (deg) of **2**. **Table S6** shows the details of H-Bs for **2**. **Table S7** shows the fractional atomic coordinates and equivalent thermal isotropic displacement  $U(\text{eq})$  of **3** with estimated standard deviations (esd) in parentheses. **Table S8** shows the selected bond lengths (Å) and angles (deg) of **3**. **Table S9** shows the details of H-Bs for **3**. Crystallographic data for the structure of **1**, **2**, and **3** in this paper have been deposited with the Cambridge Crystallographic Data Centre, CCDC, 12 Union Road, Cambridge CB21EZ, UK. Copies of the data can be obtained free of charge on quoting the depository number CCDC-2235623(**1**), CCDC-2235626(**2**), and CCDC-2280228(**3**).

**Table S1** Final atomic coordinates and equivalent isotropic displacement parameters for **1**.

| Atom | <i>x</i>  | <i>y</i>  | <i>z</i>  | $U(\text{eq})$ |
|------|-----------|-----------|-----------|----------------|
| Bi1  | 7796.1(2) | 2015.7(2) | 1752.9(2) | 29.87(9)       |
| Bi2  | 7502.7(2) | 4081.4(2) | 3325.7(2) | 31.91(8)       |
| Br6  | 7752.2(6) | 1517.4(6) | 3908.1(5) | 35.72(15)      |
| Br3  | 9955.8(6) | 662.3(6)  | 1896.9(5) | 37.50(16)      |
| Br4  | 9408.5(6) | 3888.9(6) | 1748.5(5) | 36.21(16)      |
| Br5  | 5690.4(6) | 3722.6(6) | 1891.9(5) | 40.21(16)      |
| Br8  | 7268.2(6) | 6436.0(6) | 2619.5(5) | 39.97(16)      |
| Br2  | 7765.0(7) | 2608.0(7) | -208.0(5) | 43.56(18)      |
| Br1  | 6286.7(7) | 318.7(6)  | 1961.3(5) | 44.38(18)      |
| Br9  | 9313.4(7) | 4082.3(7) | 4508.3(5) | 45.68(18)      |
| Br7  | 5764.6(7) | 3891.1(7) | 4660.2(6) | 51.3(2)        |
| N4   | 7055(5)   | 6888(5)   | -91(4)    | 37.6(13)       |
| N8   | 3089(5)   | 7640(5)   | 2799(4)   | 37.2(13)       |
| N5   | 7857(5)   | 8438(5)   | 173(4)    | 38.9(13)       |
| N2   | 12951(5)  | 1603(5)   | 3662(4)   | 40.6(14)       |
| N1   | 10866(6)  | 1539(6)   | 3896(5)   | 57.1(19)       |
| N7   | 2140(5)   | 6002(5)   | 2880(4)   | 42.0(14)       |
| N6   | 9089(5)   | 6801(5)   | 326(4)    | 39.7(14)       |
| N3   | 12068(6)  | 1674(5)   | 5094(4)   | 44.6(15)       |
| N9   | 4199(5)   | 6107(5)   | 2557(4)   | 47.0(15)       |
| C3   | 11964(6)  | 1596(6)   | 4216(5)   | 34.7(15)       |
| C8   | 8001(6)   | 7367(6)   | 140(4)    | 33.4(15)       |
| C9   | 8783(7)   | 8846(7)   | 683(5)    | 45.6(18)       |
| C12  | 2255(7)   | 8032(7)   | 3444(6)   | 51(2)          |
| C6   | 7279(7)   | 5849(6)   | -345(5)   | 44.3(17)       |
| C13  | 3137(6)   | 6585(6)   | 2750(4)   | 38.6(16)       |
| C10  | 7012(8)   | 9335(7)   | -443(5)   | 50.3(19)       |
| C7   | 5795(6)   | 7129(7)   | 185(5)    | 47.9(19)       |
| C11  | 4124(7)   | 8333(7)   | 2450(6)   | 52(2)          |

|     |           |          |         |       |
|-----|-----------|----------|---------|-------|
| C1  | 11086(8)  | 1356(7)  | 5825(5) | 59(2) |
| C14 | 2275(9)   | 4777(8)  | 3033(8) | 76(3) |
| C15 | 895(7)    | 6556(8)  | 2632(5) | 51(2) |
| C5  | 12837(7)  | 1832(7)  | 2635(5) | 50(2) |
| C4  | 14102(8)  | 999(10)  | 4055(6) | 79(3) |
| C2  | 13059(10) | 2233(10) | 5355(6) | 83(3) |

**Table S2** Selected bonds length (Å) and angles (°) for **1**.

|         |           |        |           |             |            |             |            |
|---------|-----------|--------|-----------|-------------|------------|-------------|------------|
| Bi1—Br6 | 3.0319(7) | N8—C11 | 1.460(8)  | Br6—Bi1—Br4 | 84.333(18) | Br2—Bi6—Br1 | 81.950(18) |
| Bi1—Br3 | 2.7545(8) | N5—C8  | 1.343(9)  | Br6—Bi1—Br5 | 80.92(2)   | Br1—Bi4—Br2 | 80.022(16) |
| Bi1—Br4 | 3.0324(7) | N5—C9  | 1.491(9)  | Br3—Bi1—Br6 | 90.31(2)   | Br1—Bi5—Br2 | 80.273(18) |
| Bi1—Br5 | 3.0450(8) | N5—C10 | 1.466(9)  | Br3—Bi1—Br4 | 85.55(2)   | C8—N4—C6    | 119.6(6)   |
| Bi1—Br2 | 2.7417(7) | N2—C3  | 1.333(8)  | Br3—Bi1—Br5 | 92.73(10)  | C8—N4—C7    | 122.3(6)   |
| Bi1—Br1 | 2.7192(9) | N2—C5  | 1.454(9)  | Br4—Bi1—Br5 | 175.85(7)  | C6—N4—C7    | 115.3(6)   |
| Bi2—Br6 | 3.0081(8) | N2—C4  | 1.446(10) | Br2—Bi1—Br6 | 174.29(8)  | C13—N8—C12  | 123.0(6)   |
| Bi2—Br4 | 3.1268(7) | N1—C3  | 1.320(9)  | Br2—Bi1—Br3 | 87.56(10)  | C13—N8—C11  | 119.5(6)   |
| Bi2—Br5 | 3.0990(7) | N7—C13 | 1.334(8)  | Br2—Bi1—Br4 | 93.81(2)   | C11—N8—C12  | 114.7(6)   |
| Bi2—Br8 | 2.7608(8) | N7—C14 | 1.460(11) | Br2—Bi1—Br5 | 95.64(2)   | C8—N5—C9    | 119.4(6)   |
| Bi2—Br9 | 2.6785(7) | N7—C15 | 1.475(10) | Br1—Bi1—Br6 | 89.49(2)   | C8—N5—C10   | 123.8(6)   |
| Bi2—Br7 | 2.6610(7) | N6—C8  | 1.319(9)  | Br1—Bi1—Br3 | 96.00(2)   | C10—N5—C9   | 115.2(6)   |
| N4—C8   | 1.340(8)  | N3—C3  | 1.336(9)  | Br1—Bi1—Br4 | 173.65(2)  | C3—N2—C5    | 121.1(6)   |
| N4—C6   | 1.455(9)  | N3—C1  | 1.482(9)  | Br1—Bi1—Br5 | 93.07(2)   | C3—N2—C4    | 121.3(6)   |
| N4—C7   | 1.460(9)  | N3—C2  | 1.459(11) | Br1—Bi1—Br2 | 92.27(2)   | C4—N2—C5    | 113.9(6)   |
| N8—C12  | 1.463(9)  | N9—C13 | 1.325(9)  | Br6—Bi2—Br4 | 83.120(18) | C17—N7—C14  | 119.5(7)   |
| N8—C13  | 1.331(9)  |        |           | Br6—Bi2—Br5 | 80.40(2)   | C13—N7—C15  | 123.0(7)   |
|         |           |        |           | Br5—Bi2—Br4 | 82.043(19) | C14—N7—C15  | 115.6(6)   |
|         |           |        |           | Br8—Bi2—Br6 | 174.75(2)  | C3—N3—C1    | 122.0(6)   |
|         |           |        |           | Br8—Bi2—Br4 | 93.03(2)   | C3—N3—C2    | 122.6(6)   |
|         |           |        |           | Br8—Bi2—Br5 | 95.57(2)   | C2—N3—C1    | 114.8(7)   |
|         |           |        |           | Br9—Bi2—Br6 | 91.53(2)   | N2—C3—N3    | 120.5(6)   |
|         |           |        |           | Br9—Bi2—Br4 | 90.82(2)   | N1—C3—N2    | 120.3(6)   |

|             |           |           |          |
|-------------|-----------|-----------|----------|
| Br9—Bi2—Br5 | 169.78(2) | N1—C3—N3  | 119.2(6) |
| Br9—Bi2—Br8 | 92.09(2)  | N4—C8—N5  | 120.3(6) |
| Br7—Bi2—Br6 | 87.81(2)  | N6—C8—N4  | 120.7(6) |
| Br7—Bi2—Br4 | 169.84(2) | N6—C8—N5  | 119.0(6) |
| Br7—Bi2—Br5 | 91.96(2)  | N8—C13—N7 | 121.6(7) |
| Br7—Bi2—Br8 | 95.72(2)  | N9—C13—N8 | 119.2(6) |
| Br7—Bi2—Br9 | 94.01(3)  | N9—C13—N7 | 119.2(7) |

**Table S3** Details of hydrogen bonds for **1**.

| D—H...A                   | d(D—H)(Å) | d(H—A)/Å | d(D—A)/Å | D—H—A/° |
|---------------------------|-----------|----------|----------|---------|
| N1—H1A...Br3              | 0.88      | 2.82     | 3.643(7) | 156.4   |
| N1—H1B...Br6              | 0.88      | 2.77     | 3.409(6) | 131.0   |
| N6—H6A...Br4              | 0.88      | 2.88     | 3.540(6) | 133.0   |
| N6—H6B...Br2 <sup>1</sup> | 0.88      | 2.82     | 3.567(6) | 144.0   |
| N9—H9D...Br8              | 0.88      | 2.64     | 3.424(6) | 148.0   |
| N9—H9E...Br5              | 0.88      | 2.89     | 3.652(6) | 145.6   |

<sup>1</sup>2-X,1-Y,-Z

**Table S4** Final atomic coordinates and equivalent isotropic displacement parameters for **2**.

| Atom | x         | y         | z          | U(eq)     |
|------|-----------|-----------|------------|-----------|
| Bi1  | 3392.2(2) | 5000      | 4564.5(3)  | 27.53(11) |
| Br1  | 1826.0(6) | 5000      | 1379.3(10) | 37.05(19) |
| Br4  | 5293.9(5) | 5000      | 7511.5(9)  | 32.61(17) |
| Br3  | 3418.7(4) | 6681.2(3) | 4746.7(6)  | 34.54(15) |
| Br2  | 2345.1(7) | 5000      | 6552.9(12) | 44.8(2)   |
| N2   | 3877(3)   | 7758(3)   | 10997(6)   | 35.0(10)  |
| N1   | 3332(4)   | 7192(3)   | 8553(6)    | 42.5(11)  |
| C1   | 5099(5)   | 8737(4)   | 12749(8)   | 47.4(14)  |
| C5   | 4140(4)   | 6982(3)   | 11264(7)   | 36.2(12)  |

|    |         |         |          |          |
|----|---------|---------|----------|----------|
| C3 | 3376(4) | 7875(4) | 9331(7)  | 37.7(12) |
| C2 | 4104(5) | 8379(3) | 12319(8) | 44.8(14) |
| C4 | 3798(4) | 6627(3) | 9755(7)  | 37.9(12) |

**Table S5** Selected bond length (Å) and angles (°) for **2**.

|                      |           |                                        |            |                          |            |
|----------------------|-----------|----------------------------------------|------------|--------------------------|------------|
| Bi1—Br1              | 2.7861(8) | Br1—Bi1—Br4                            | 168.18(3)  | Br2—Bi1—Br4              | 92.86(3)   |
| Bi1—Br4              | 2.9341(8) | Br1—Bi1—Br4 <sup>1</sup>               | 84.49(2)   | Br2—Bi1—Br3 <sup>2</sup> | 87.970(12) |
| Bi1—Br4 <sup>1</sup> | 3.1150(8) | Br1—Bi1—Br3                            | 92.376(11) | Br2—Bi1—Br3              | 87.969(12) |
| Bi1—Br3              | 2.8566(5) | Br1—Bi1—Br3 <sup>2</sup>               | 92.377(11) | Bi1—Br4—Bi1 <sup>1</sup> | 96.31(2)   |
| Bi1—Br3 <sup>2</sup> | 2.8566(5) | Br4—Bi1—Br4 <sup>1</sup>               | 83.69(2)   | C5—N2—C2                 | 126.5(5)   |
| Bi1—Br2              | 2.7223(9) | Br3 <sup>2</sup> —Bi1—Br4 <sup>1</sup> | 91.901(12) | C3—N2—C5                 | 108.7(5)   |
| N2—C5                | 1.367(7)  | Br3—Bi1—Br4 <sup>1</sup>               | 91.902(12) | C3—N2—C2                 | 124.8(5)   |
| N2—C3                | 1.335(7)  | Br3—Bi1—Br4                            | 88.019(11) | C3—N1—C4                 | 108.9(5)   |
| N2—C2                | 1.485(7)  | Br3 <sup>2</sup> —Bi1—Br4              | 88.018(11) | N1—C3—N2                 | 107.5(5)   |
| N1—C3                | 1.325(8)  | Br3—Bi1—Br3 <sup>2</sup>               | 174.18(2)  | N2—C2—C1                 | 107.7(5)   |
| N1—C4                | 1.375(7)  | Br2—Bi1—Br1                            | 98.96(3)   | N2—C2—C1                 | 112.1(5)   |
| C1—C2                | 1.495(9)  | Br2—Bi1—Br4 <sup>1</sup>               | 176.55(2)  | C5—C4—N1                 | 107.2(5)   |
| C5—C4                | 1.330(8)  |                                        |            |                          |            |

<sup>1</sup>1-X,1-Y,1-Z; <sup>2</sup>+X,1-Y,+Z

**Table S6** Details of hydrogen bonds for **2**.

| D—H...A                  | d(D—H)(Å) | d(H—A)/Å | d(D—A)/Å | D—H—A/° |
|--------------------------|-----------|----------|----------|---------|
| N1—H1...Br3              | 0.88      | 2.68     | 3.427(5) | 143.1   |
| N1—H1...Br3 <sup>1</sup> | 0.88      | 3.03     | 3.536(5) | 118.6   |

<sup>1</sup>1/2-X,3/2-Y,1-Z

**Table S7** Final atomic coordinates and equivalent isotropic displacement parameters for **3**.

| Atom | x          | y          | z          | U(eq)    |
|------|------------|------------|------------|----------|
| Bi1  | 4785.2(14) | 2496(3)    | 6024(3)    | 20.5(7)  |
| Bi2  | 6607.2(11) | 2501.1(13) | 4213.6(16) | 21.4(4)  |
| Br6  | 4775(6)    | 2888(5)    | 3469(5)    | 22.8(16) |

|      |          |          |          |          |
|------|----------|----------|----------|----------|
| Br5  | 5841(6)  | 1002(7)  | 5635(12) | 24.3(19) |
| Br7  | 3929(4)  | 4023(3)  | 6255(7)  | 28.8(13) |
| Br9  | 3483(4)  | 1413(4)  | 5381(6)  | 28.9(13) |
| Br4  | 6269(5)  | 3557(6)  | 6434(9)  | 24.0(16) |
| Br8  | 5011(4)  | 2072(6)  | 8415(5)  | 28.6(13) |
| Br3  | 6524(4)  | 1656(6)  | 2140(5)  | 40.5(17) |
| Br2  | 8022(3)  | 1844(5)  | 5133(6)  | 40.9(17) |
| Br1  | 7182(4)  | 3995(4)  | 3450(6)  | 40.1(14) |
| Bi2A | 3135(7)  | 2499(6)  | 7677(13) | 31(2)    |
| C3   | 4390(20) | 1030(30) | 810(30)  | 37(8)    |
| C5   | 7920(30) | 400(30)  | 7920(40) | 48(6)    |
| C7   | 6470(20) | 6070(30) | 5010(40) | 53(10)   |
| C6   | 7400(30) | 1870(20) | 8430(50) | 48(6)    |
| C2   | 4570(30) | 310(30)  | 2770(30) | 42(9)    |
| C1   | 3300(20) | 910(30)  | 1970(40) | 43(9)    |
| C4   | 6870(30) | 560(30)  | 9120(40) | 48(6)    |
| N2   | 7160(20) | 987(19)  | 8200(30) | 51(5)    |
| C9   | 5200(30) | 5310(30) | 4050(40) | 52(10)   |
| N1   | 4140(20) | 960(30)  | 2100(30) | 54(7)    |
| N3   | 5670(30) | 5560(30) | 5160(40) | 60(7)    |
| C8   | 5300(30) | 6100(30) | 5890(40) | 58(10)   |
| Br1A | 2511(17) | 942(16)  | 8500(30) | 30(4)    |
| Br3A | 3200(20) | 3340(20) | 9900(20) | 33(4)    |
| Br2A | 1630(16) | 3200(20) | 6790(30) | 31(4)    |
| Bi1A | 4966(11) | 2524(17) | 5920(20) | 27(3)    |
| Br4A | 3503(19) | 1570(20) | 5640(30) | 30(4)    |
| Br6A | 4787(13) | 2070(30) | 8290(30) | 30(4)    |
| Br5A | 3830(20) | 3817(18) | 6350(40) | 30(4)    |
| Br9A | 6270(30) | 3700(30) | 6590(60) | 29(5)    |
| Br7A | 5940(40) | 1040(30) | 5580(70) | 29(5)    |
| Br8A | 4830(30) | 3080(30) | 3520(30) | 31(5)    |

**Table S8** Selected bond length (Å) and angles (°) for **3**.

|         |          |             |          |                |           |
|---------|----------|-------------|----------|----------------|-----------|
| Bi1—Br6 | 2.981(6) | Br5—Bi1—Br6 | 84.3(3)  | Br3A—Bi2A—Br4A | 164.9(12) |
| Bi1—Br5 | 2.978(7) | Br5—Bi1—Br4 | 84.2(3)  | Br3A—Bi2A—Br6A | 90.0(12)  |
| Bi1—Br7 | 2.772(6) | Br7—Bi1—Br6 | 91.0(3)  | Br3A—Bi2A—Br5A | 102.3(12) |
| Bi1—Br9 | 2.768(6) | Br7—Bi1—Br5 | 172.7(3) | Br2A—Bi2A—Br3A | 92.7(12)  |
| Bi1—Br4 | 2.981(7) | Br7—Bi1—Br4 | 89.8(3)  | Br2A—Bi2A—Br4A | 102.0(12) |

|           |           |                |            |                |           |
|-----------|-----------|----------------|------------|----------------|-----------|
| Bi1—Br8   | 2.770(6)  | Br9—Bi1—Br6    | 89.5(3)    | Br2A—Bi2A—Br6A | 167.9(12) |
| Bi2—Br6   | 3.176(10) | Br9—Bi1—Br5    | 90.1(3)    | Br2A—Bi2A—Br5A | 89.5(12)  |
| Bi2—Br5   | 3.203(12) | Br9—Bi1—Br7    | 95.4(2)    | Br6A—Bi2A—Br4A | 74.8(11)  |
| Bi2—Br4   | 3.141(8)  | Br9—Bi1—Br4    | 172.2(3)   | Br6A—Bi2A—Br5A | 78.4(11)  |
| Bi2—Br3   | 2.676(6)  | Br9—Bi1—Br8    | 95.3(2)    | Br5A—Bi2A—Br4A | 74.7(11)  |
| Bi2—Br2   | 2.668(6)  | Br4—Bi1—Br6    | 84.5(3)    | C6—N2—C5       | 109(3)    |
| Bi2—Br1   | 2.669(6)  | Br8—Bi1—Br6    | 172.1(3)   | C4—N2—C5       | 107(3)    |
| Bi2A—Br1A | 2.81(2)   | Br8—Bi1—Br5    | 89.5(3)    | C4—N2—C6       | 116(4)    |
| Bi2A—Br3A | 2.83(2)   | Br8—Bi1—Br7    | 94.7(3)    | C2—N1—C3       | 111(3)    |
| Bi2A—Br2A | 2.82(2)   | Br8—Bi1—Br4    | 90.1(3)    | C2—N1—C1       | 117(4)    |
| Bi2A—Br4A | 2.89(2)   | Br6—Bi2—Br5    | 77.6(2)    | C1—N1—C3       | 110(3)    |
| Bi2A—Br6A | 2.88(2)   | Br4—Bi2—Br6    | 78.8(2)    | C9—N3—C7       | 113(4)    |
| Bi2A—Br5A | 2.89(2)   | Br4—Bi2—Br5    | 78.1(3)    | C8—N3—C7       | 106(3)    |
| C3—N1     | 1.61(5)   | Br3—Bi2—Br6    | 87.4(2)    | C8—N3—C9       | 116(4)    |
| C5—N2     | 1.66(5)   | Br3—Bi2—Br5    | 98.8(3)    | Br4A—Bi1A—Br5A | 75.2(11)  |
| C7—N3     | 1.62(6)   | Br3—Bi2—Br4    | 166.2(3)   | Br6A—Bi1A—Br4A | 75.4(11)  |
| C6—N2     | 1.40(4)   | Br2—Bi2—Br6    | 165.79(19) | Br6A—Bi1A—Br5A | 78.9(11)  |
| C2—N1     | 1.37(5)   | Br2—Bi2—Br5    | 88.2(3)    | Br9A—Bi1A—Br4A | 166.9(17) |
| C1—N1     | 1.43(5)   | Br2—Bi2—Br4    | 99.0(3)    | Br9A—Bi1A—Br6A | 96.1(17)  |
| C4—N2     | 1.40(6)   | Br2—Bi2—Br3    | 94.3(3)    | Br9A—Bi1A—Br5A | 93.6(17)  |
| C9—N3     | 1.43(5)   | Br2—Bi2—Br1    | 94.4(2)    | Br9A—Bi1A—Br7A | 94(2)     |
| C8—N3     | 1.40(6)   | Br1—Bi2—Br6    | 99.6(2)    | Br7A—Bi1A—Br4A | 97.0(18)  |
| Bi1A—Br4A | 2.87(2)   | Br1—Bi2—Br5    | 166.4(2)   | Br7A—Bi1A—Br6A | 96.1(19)  |
| Bi1A—Br6A | 2.87(2)   | Br1—Bi2—Br4    | 88.3(2)    | Br7A—Bi1A—Br5A | 171.5(17) |
| Bi1A—Br5A | 2.87(2)   | Br1—Bi2—Br3    | 94.3(2)    | Br8A—Bi1A—Br4A | 96.8(15)  |
| Bi1A—Br9A | 2.86(2)   | Br1—Bi6—Br2    | 82.4(2)    | Br8A—Bi1A—Br6A | 168.8(14) |
| Bi1A—Br7A | 2.86(2)   | Br1—Bi5—Br2    | 82.0(3)    | Br8A—Bi1A—Br5A | 91.4(16)  |
| Bi1A—Br8A | 2.85(2)   | Br1—Bi4—Br2    | 82.98(16)  | Br8A—Bi1A—Br9A | 90.1(17)  |
|           |           | Br1A—Bi2A—Br3A | 91.6(11)   | Br8A—Bi1A—Br7A | 93(2)     |

|                |           |                |         |
|----------------|-----------|----------------|---------|
| Br1A—Bi2A—Br2A | 93.0(11)  | Bi1A—Br4A—Bi2A | 89.0(7) |
| Br1A—Bi2A—Br4A | 91.2(11)  | Bi1A—Br6A—Bi2A | 89.1(7) |
| Br1A—BiXA—Br6A | 98.7(11)  | Bi1A—Br5A—Bi2A | 89.0(7) |
| Br1A—Bi2A—Br5A | 165.8(12) |                |         |

**Table S9** Details of hydrogen bonds for **3**.

| D—H...A     | d(D—H)(Å) | d(H—A)/Å | d(D—A)/Å | D—H—A/° |
|-------------|-----------|----------|----------|---------|
| N2—H2...Br5 | 1.00      | 2.39     | 3.38(4)  | 173.9   |
| N1—H1...Br6 | 1.00      | 2.39     | 3.39(4)  | 175.8   |
| N3—H3...Br4 | 1.00      | 2.43     | 3.42(4)  | 171.6   |
